# Supplementary material for: ReaDDy 2: Fast and flexible software framework for interacting-particle reaction dynamics
Source: PubMed Central journal article supplement (PMC6413953; doi:10.1371/journal.pcbi.1006830), 2019-02-28
Supplement: pcbi.1006830.s001.pdf [file pcbi.1006830.s001.pdf]

**S1 Table. Parameters of density-dependent reaction kinetics.**

| Quantity                  | Symbol                                | Value                 | Unit                         |
|---------------------------|---------------------------------------|-----------------------|------------------------------|
| Thermal energy            | $k_B T$                               | 2.49                  | $\text{kJ mol}^{-1}$         |
| Volume                    | $V$                                   | $100^3$               | $\text{nm}^3$                |
| Radius $A$                | $r_A$                                 | 1                     | nm                           |
| Radius $B$                | $r_B$                                 | 0.8                   | nm                           |
| Radius $C$                | $r_C$                                 | 1                     | nm                           |
| Diffusion coeff. $A$      | $D_A$                                 | 0.01                  | $\text{nm}^2 \text{ns}^{-1}$ |
| Diffusion coeff. $B$      | $D_B$                                 | 0.0125                | $\text{nm}^2 \text{ns}^{-1}$ |
| Diffusion coeff. $C$      | $D_C$                                 | 0.01                  | $\text{nm}^2 \text{ns}^{-1}$ |
| Charge $A$                | $q_A$                                 | 1.3                   | –                            |
| Charge $B$                | $q_B$                                 | –1                    | –                            |
| Charge $C$                | $q_C$                                 | 0                     | –                            |
| Screening parameter       | $\kappa$                              | 3.82                  | $\text{nm}^{-1}$             |
| Debye-Hückel prefactor    | $e^2 \epsilon_0^{-1} \epsilon_r^{-1}$ | 2349                  | $\text{kJ nm mol}^{-1}$      |
| Repulsion energy          | $U_r$                                 | 1.                    | $\text{kJ mol}^{-1}$         |
| Cutoff radius             | $r_{\text{cutoff}}$                   | 4.7                   | nm                           |
| Reaction radius           | $R$                                   | 2.                    | nm                           |
| Equilibrium constant      | $K_{\text{dilute}}$                   | $6.16 \times 10^{-5}$ | $\text{nm}^{-3}$             |
| Macroscopic rate constant | $k_{\text{on}}$                       | 0.11                  | $\text{nm}^3 \text{ns}^{-1}$ |
| Macroscopic rate constant | $k_{\text{off}}$                      | $6.58 \times 10^{-6}$ | $\text{ns}^{-1}$             |
| Microscopic rate constant | $\lambda_{\text{on}}$                 | $5.61 \times 10^{-3}$ | $\text{ns}^{-1}$             |
| Microscopic rate constant | $\lambda_{\text{off}}$                | $6.58 \times 10^{-6}$ | $\text{ns}^{-1}$             |
| Timestep                  | $\tau$                                | 0.1                   | ns                           |

This table contains parameters for the Debye-Hückel system in the results section.
